# Supplementary material
Source: PubMed Central journal article supplement (PMC2786788)

## Supplemental Information

**Figure S1. Time profile of monokine secretion.** Secreted IL-6 (left) and MCP-1 (right) concentrations were measured after 4 h culture of aortic explants from sham- (n=6) or Ang II-infused mice after 6 d or 10 d (n=7 in each group). Data are presented as mean  $\pm$  SEM. The differences in IL-6 for sham versus Ang-II at 6 days and at 10 days are significant at  $p < 0.001$ . The differences in MCP-1 for sham versus Ang-II at 6 days and at 10 days are also significant at  $p < 0.01$ . In neither case is the difference between 6 d and 10 d significant. Data were analysed using one-way analysis of variance (3 groups), followed by a Tukey's HSD post-hoc test for significance.

**Figure S2. Time profile of aortic digestion.** Dissected aortae were subjected to collagenase- elastase digestion for the indicated times (Methods). At each time point, the weight of undigested tissue and dissociated cells was determined and plotted. Greater than 50 % digestion is seen within 1 h of collagenase incubation.

**Figure S3.  $\beta$ -actin staining in undigested tissue.** Dissected aortae were subjected to collagenase- elastase digestion for the indicated times (Methods). At each time point, undigested aortic tissue was extracted in SDS-PAGE buffer, sonicated, and fractionated by SDS-PAGE for Western immunoblot analysis. Top panel, Western immunoblot showing specific  $\beta$ -actin signal. Bottom panel, quantification of results.

**Figure S4. Viability of CD14<sup>+</sup> cell population.** Collagenase-dissociated cells from unstimulated aortae (digested for 2 h, room temperature) were incubated with 8  $\mu$ M ethidium homodimer solution in PBS for 15-20 min at room temperature. The cells were washed, and subjected to flow cytometric analysis. Left panel, gate containing CD14<sup>+</sup> cells are indicated by the circle in the SSC-A vs FSC-H dot blot. Right panel, measurement of cell viability. X axis, ethidium bromide staining intensity (emission at 585 nm). Y axis, number of cell events. 13 % of the cells in this gate were positive for ethidium staining (nonviable); 87 % were negative (viable).

**Figure S5.** Enlarged Figure 1B.

**Figure S6. CCR2 Ab staining specificity.** Immunohistochemical staining of anti-CCR2 Ab in Ang II-treated WT and CCR2<sup>-/-</sup> mice. CCR2 staining is red. Autofluorescence from elastin lamella is green. Secondary antibody (2<sup>nd</sup> only) is negative control. Note the specific red staining only in the Ang II stimulated WT sections.

**Figure S7.** Enlarged Figure 3D.

Figure S1

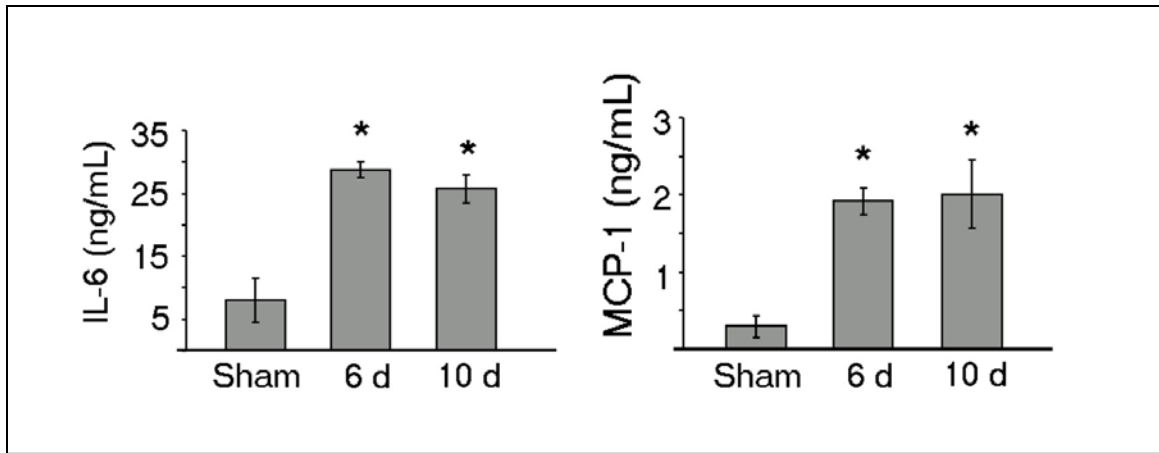

Figure S2.

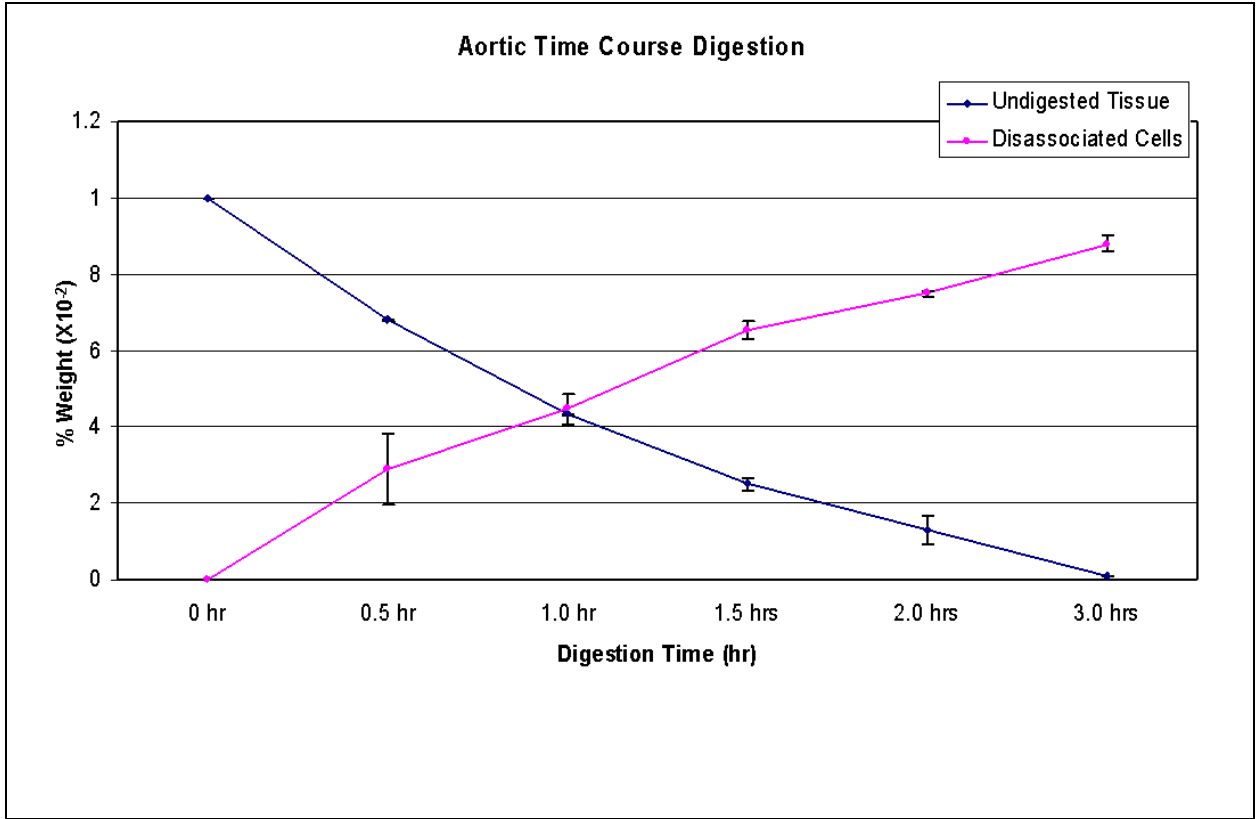

Figure S3.

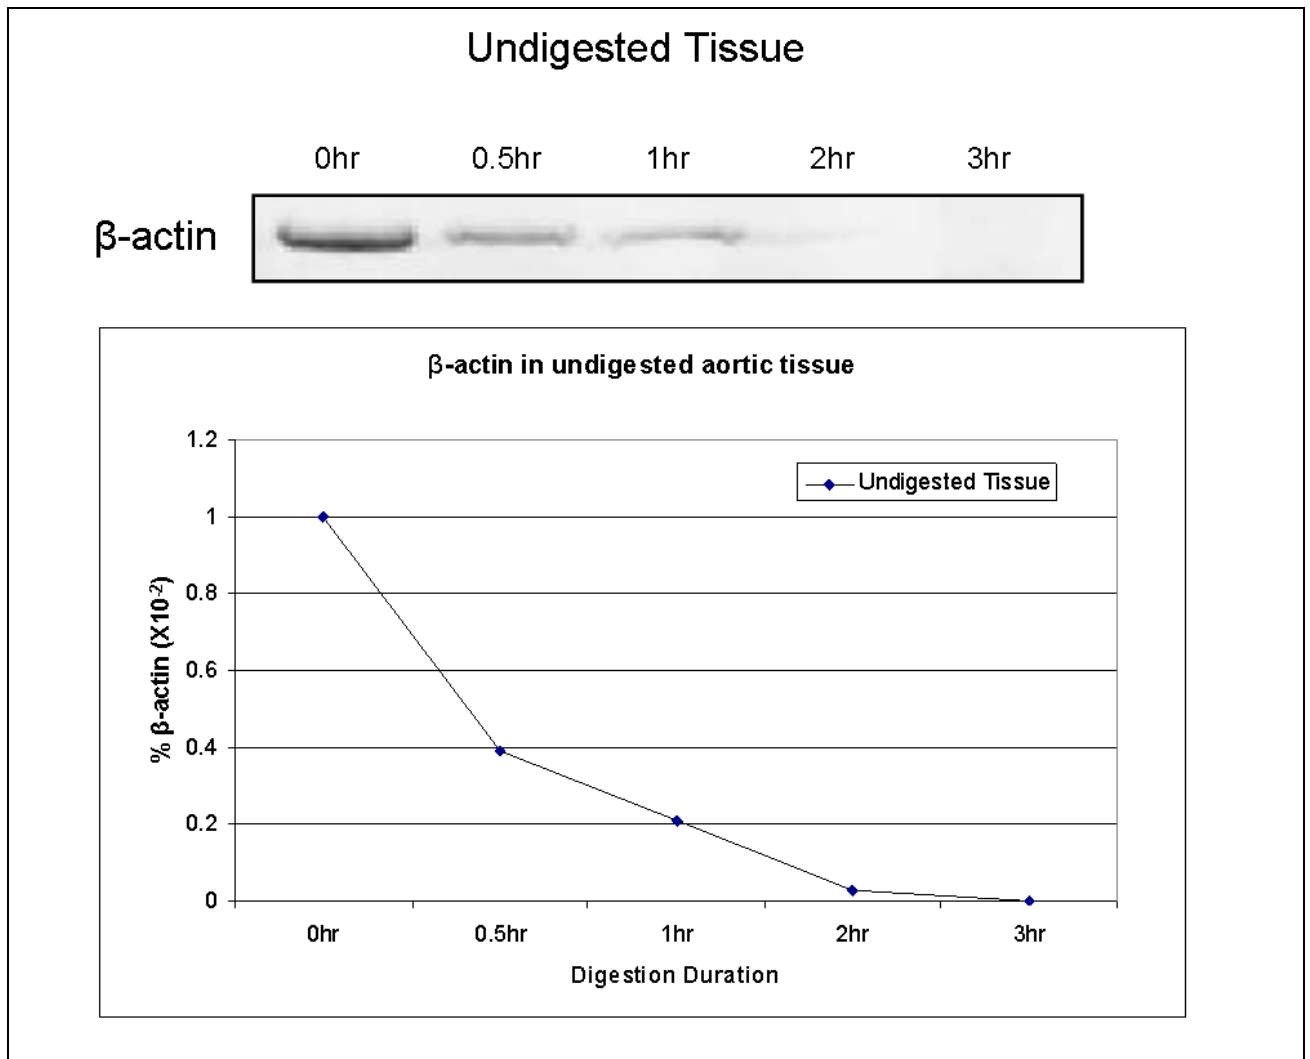

**Figure S4.**

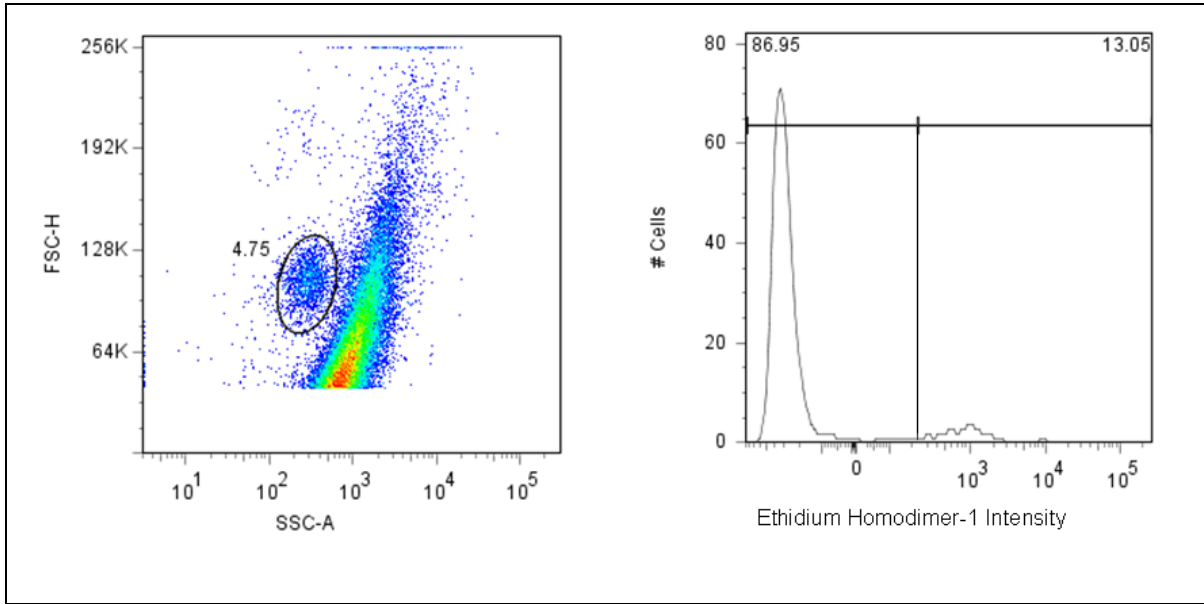

Figure S5.

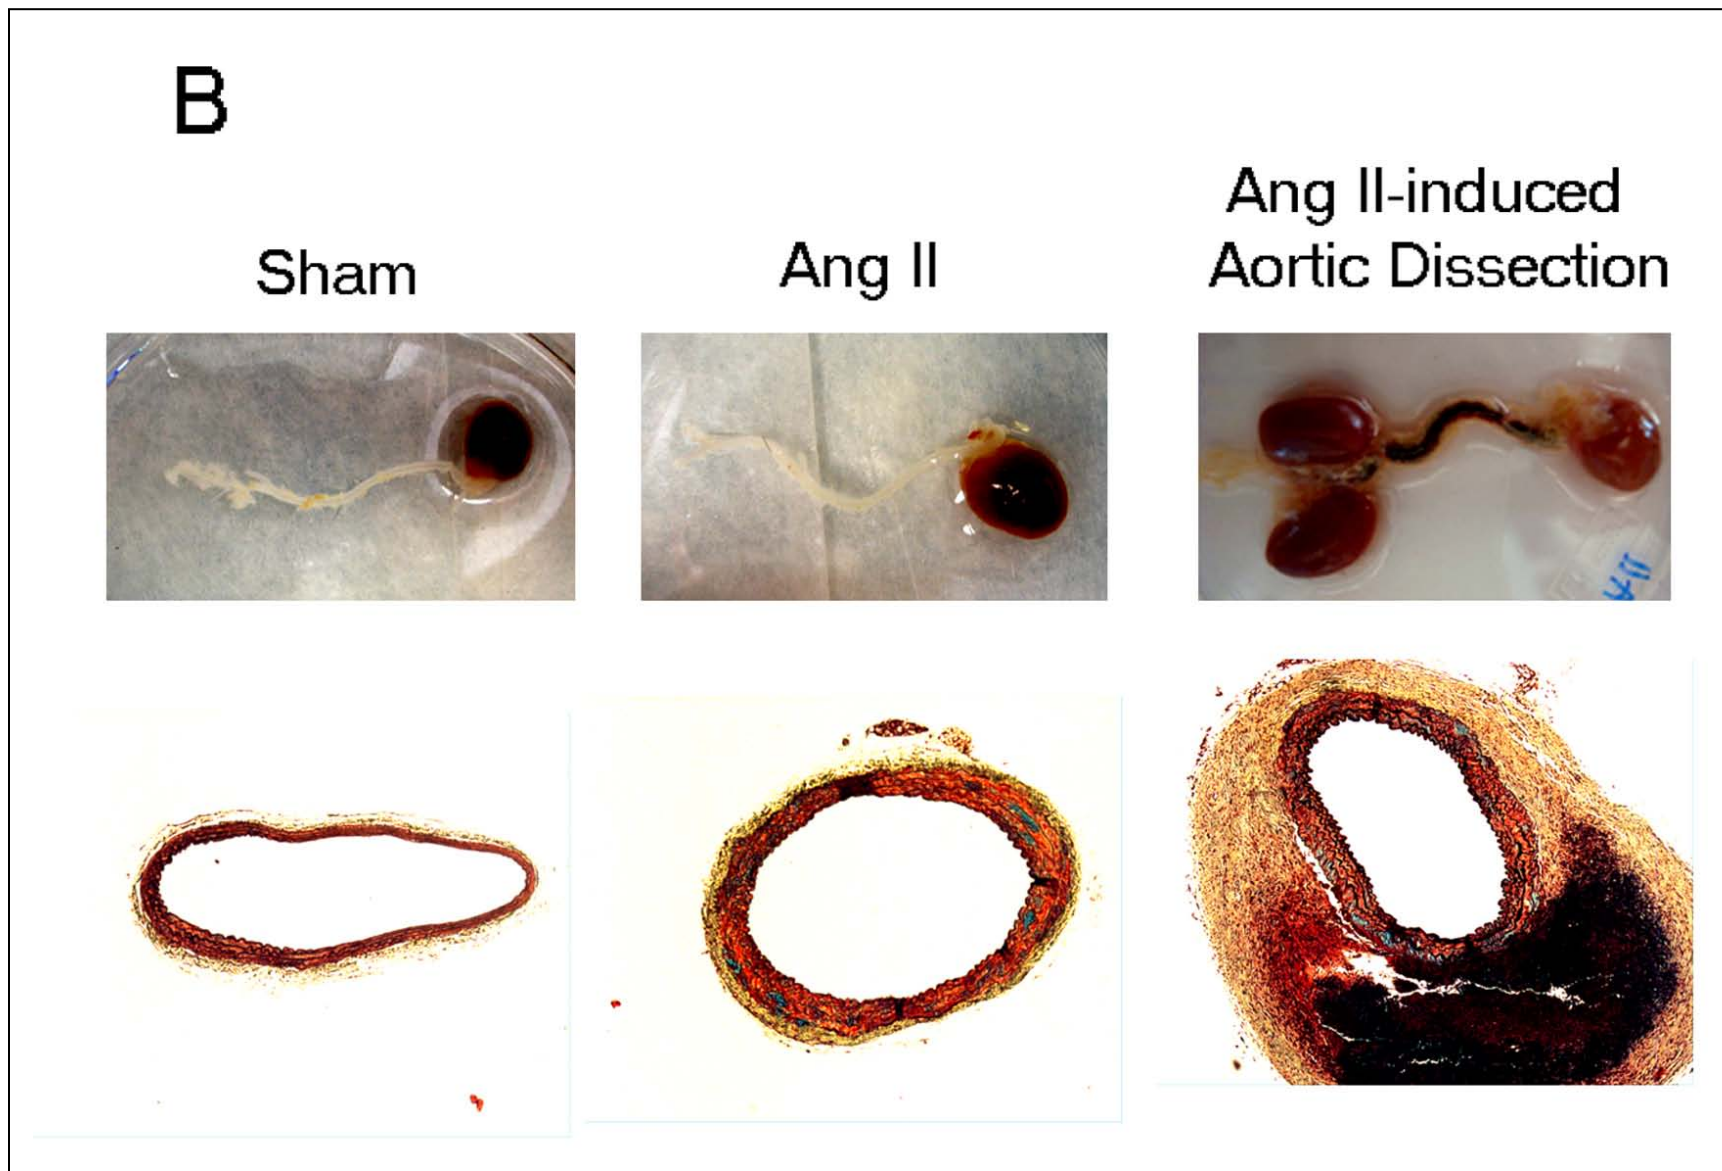

Figure S6.

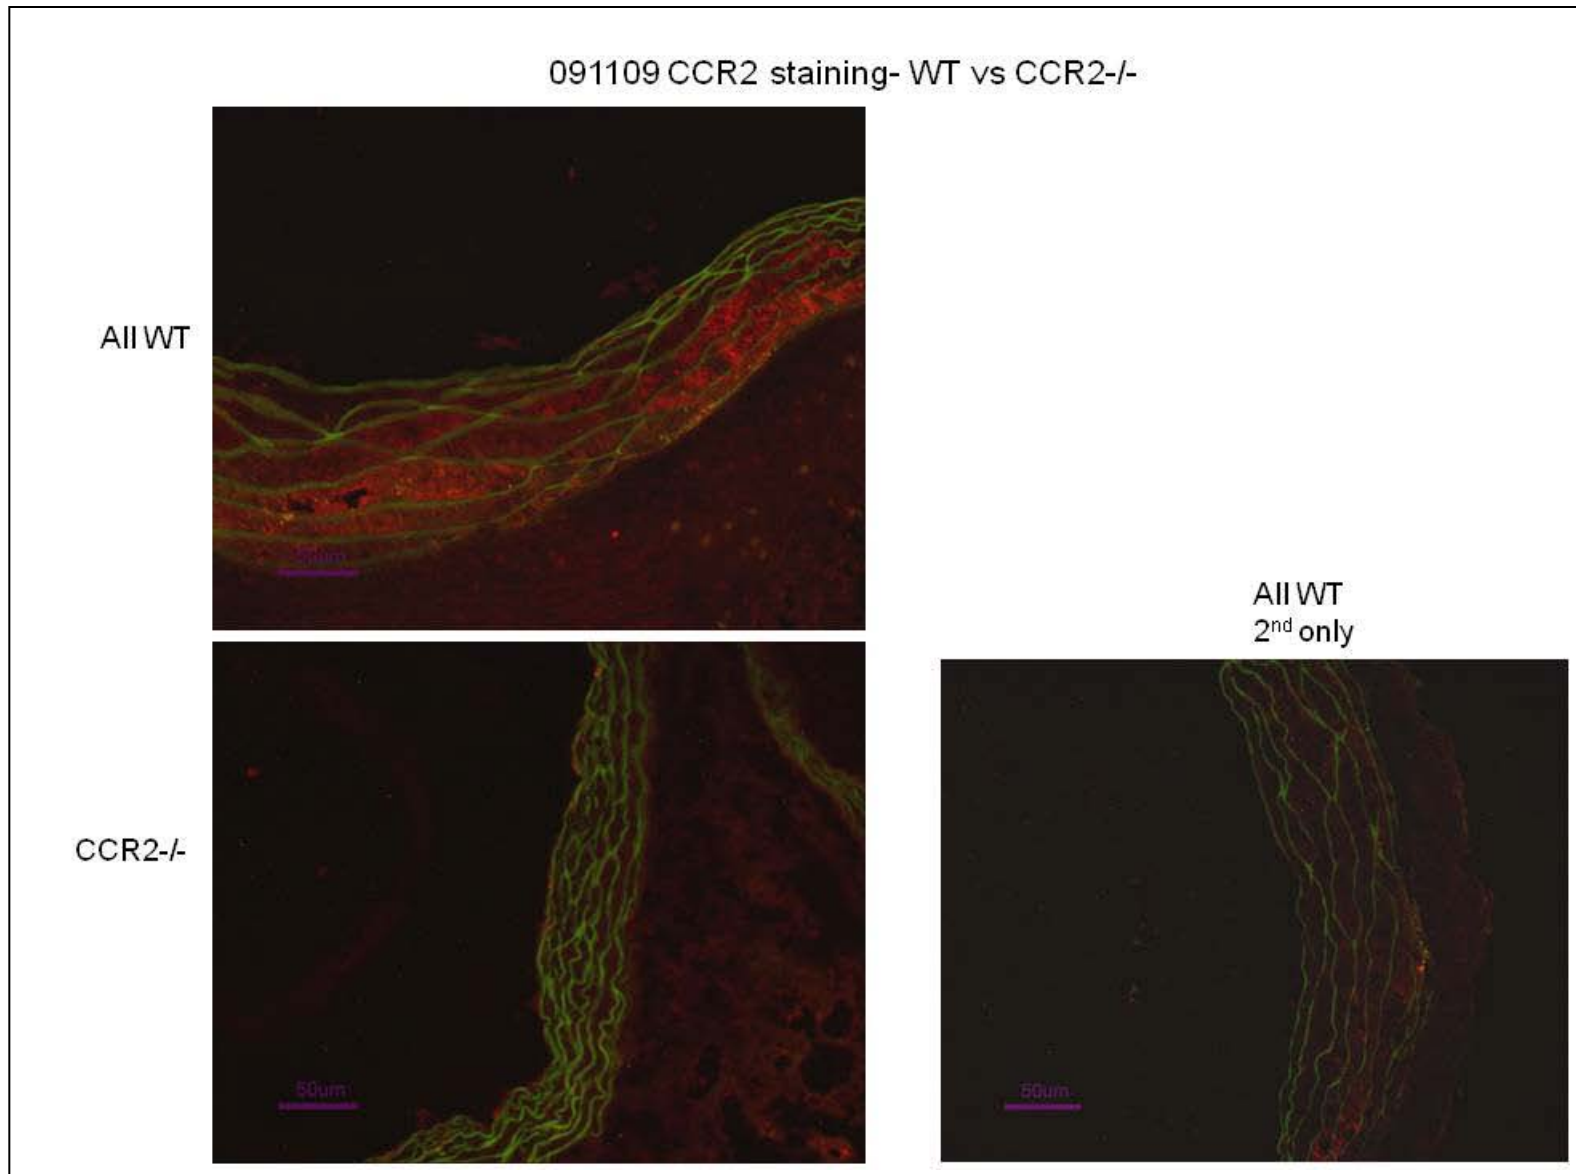



Figure S7.

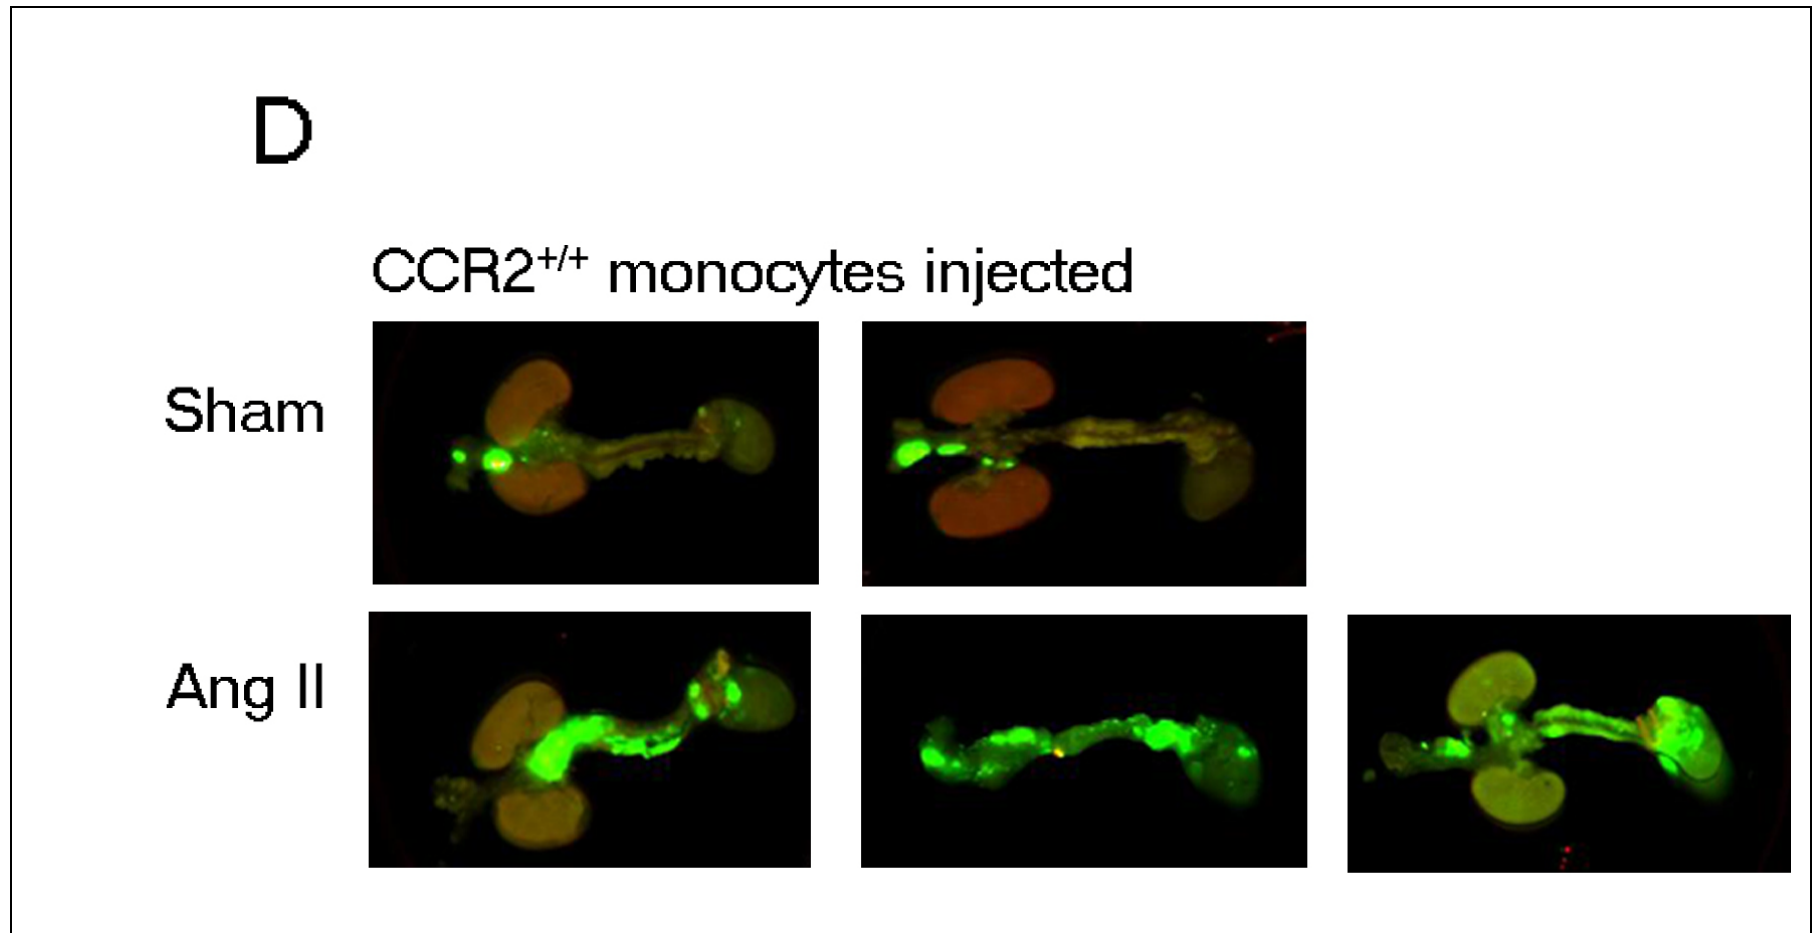

Supplement: JCI38308sd.pdf [file JCI38308sd.pdf]
